# Supplementary material for: Sex chromosome genes contribute to cocaine vulnerability in a strain-dependent manner
Source: Research Square preprint supplement (doi:10.21203/rs.3.rs-9519927/v1), 2026-05-08
Supplement: Supplementary file 1 [file b822168e8d17fa2426e2376e.docx]

**Supplemental Table 1.** primers and their sequences used for qPCR.

| Transcript |  | Nucleotide Sequence (5’ position) |
| --- | --- | --- |
| *Gapdh* |  | F: CATCACTGCCACCCAGAAGACTG |
|  |  | R: ATGCCAGTGAGCTTCCCGTTCAG |
| *Tlr7* |  | F: GTGATGCTGTGTGGTTTGTCTGG |
|  |  | R: CCTTTGTGTGCTCCTGGACCTA |
| *Tlr8* |  | F: CAGACGATGATGAGTTTGATCCACAC |
|  |  | R: TGGCATTGAAGGACAGATTTAAGCAG |

**Supplemental Table 2:** The assembly statistics were calculated using QUAST (Gurevich et al., 2013)(Gurevich et al., 2013). The N50 value is based on contigs >= 500 bp.

| Sample | Number of Read Pairs (1E6) | | Assembly Statistics | | | |
| --- | --- | --- | --- | --- | --- | --- |
| Raw data | Trimmed | # of Contigs | N50 (bp) | Largest contig (bp) | Length (Gb) |
| FXY | 541.5 | 531.2 | 450,640 | 14,904 | 241,505 | 2.40 |
| MXY | 351.0 | 344.0 | 533,871 | 11,079 | 178,028 | 2.37 |
| B6 M | 460.1 | 451.4 | 466,005 | 13,840 | 165,002 | 2.40 |

**Supplemental Table 3.** Correlation results for*Tlr8*. *Significant correlation.

|  | FCG Mice |  |  | Active nose-poke responses | Total nose-poke responses |
| --- | --- | --- | --- | --- | --- |
| *Tlr8* | B6 strain | Female XX | Spearman Correlation | 0.143 | -0.600 |
|  |  |  | Sig. (2-tailed) | 0.787 | 0.208 |
|  |  |  | N | 6 | 6 |
|  |  | Female XY | Spearman Correlation | 0.886* | 0.886* |
|  |  |  | Sig. (2-tailed) | 0.019 | 0.019 |
|  |  |  | N | 6 | 6 |
|  |  | Male XX | Spearman Correlation | -0.143 | 0.200 |
|  |  |  | Sig. (2-tailed) | 0.787 | 0.704 |
|  |  |  | N | 6 | 6 |
|  |  | Male XY | Spearman Correlation | -0.429 | 0.086 |
|  |  |  | Sig. (2-tailed) | 0.397 | 0.872 |
|  |  |  | N | 6 | 6 |
|  | MF1 strain | Female XX | Spearman Correlation | 0.029 | -0.086 |
|  |  |  | Sig. (2-tailed) | 0.957 | 0.872 |
|  |  |  | N | 6 | 6 |
|  |  | Female XY | Spearman Correlation | -0.200 | -0.100 |
|  |  |  | Sig. (2-tailed) | 0.747 | 0.873 |
|  |  |  | N | 5 | 5 |
|  |  | Male XX | Spearman Correlation | 0.771 | 0.771 |
|  |  |  | Sig. (2-tailed) | 0.072 | 0.072 |
|  |  |  | N | 6 | 6 |
|  |  | Male XY | Spearman Correlation | 0.000 | 0.000 |
|  |  |  | Sig. (2-tailed) | 1.000 | 1.000 |
|  |  |  | N | 6 | 6 |
